# Supplementary material
Source: publisher site journal article supplement (https://www.dovepress.com/article/243882)
Supplement: Supplementary file 1 [file get_supplementary_file.php]

**Table S1: Detailed BRFSS data of asthmatics from 2013 to 2017**

|  | 2013 | 2014 | 2015 | 2016 | 2017 |
| --- | --- | --- | --- | --- | --- |
| Total number of the participants | 491773 | 464664 | 441456 | 486303 | 450016 |
| 1. (Ever told) you had asthma? | 67141 | 61472 | 59409 | 65590 | 62411 |
| 1. Do you still have asthma? | 45630 | 42875 | 40000 | 45248 | 42254 |
| 1. During the past 12 months, have you had an episode of asthma or an asthma attack?(Yes/No) | 476/466 | 644/725 | 313/324 | 174/196 | 308/441 |
| 1. During the past 12 months, how many times   did you visit an emergency room or urgent  care center because of your asthma?(Yes/No) | 149/325 | 193/445 | 104/205 | 70/103 | 119/184 |
